# Supplementary material for: Coronatine Enhances Chilling Tolerance of Tomato Plants by Inducing Chilling-Related Epigenetic Adaptations and Transcriptional Reprogramming
Source: MDPI journal article supplement (doi:10.3390/ijms231710049), 2022-09-02
Supplement: s1 [file s1]

Supplemental Table S10, Overview of the primers used for RT-qPCR.

| <b>Primers for quantitative real-time PCR</b> |                         |
|-----------------------------------------------|-------------------------|
| PI-II-qRT-F                                   | AATTATCCATCATGGCTGTTCAC |
| PI-II-qRT-R                                   | CCTTTTGGATCAGATTCTCCTT  |
| TD-qRT-F                                      | AGCTCAAACACACGCGCTGGA   |
| TD-qRT-R                                      | AACCCCCACCACCAACAGGT    |
| PR1-qRT-F                                     | ATCTCATTGTTACTCACTTGTC  |
| PR1-qRT-R                                     | AACGAGCCCGACCA          |
| SlCBF1-F                                      | GACTTCGTGGATGAGGAGGC    |
| SlCBF1-R                                      | CTGCACATTGAGGTGGAGGT    |
| SlCBF2-F                                      | GGCTGCCTACTCCAGATTCC    |
| SlCBF2-R                                      | ACCACTGATTCTTCTTCCTCCG  |
| SlCBF3-F                                      | ACTTCGTGGATGAGGAAGCG    |
| SlCBF3-R                                      | GGCATATAAGCGTGCACATCA   |
| ACT2-F                                        | TTGCTGACCGTATGAGCAAG    |
| ACT2-R                                        | GGACAATGGATGGACCAGAC    |
| WRKY33-F                                      | GAATTGGGGATTTAGCGAGGA   |
| WRKY33-R                                      | TGTTGAACAAAACGGGCGAG    |
| WRKY39-F                                      | TTAGCAGCCGCCATATCAGG    |
| WRKY39-R                                      | TGGCTGCCTGTCTTTCTCTG    |
| ZF14-F                                        | TGCCACTAGTGATTGGCAGG    |
| ZF14-R                                        | AAATGGCACATTTTGCGGCT    |
| ZF (Solyc03g006250)-F                         | TATCGCGGAGGGTATGGGAT    |
| ZF (Solyc03g006250)-R                         | TGCTCCTGCCACTGCAAAT     |
